# Supplementary figures and images for: Gene Networks Driving Genetic Variation in Milk and Cheese-Making Traits of Spanish Assaf Sheep
Source: MDPI journal article supplement (doi:10.3390/genes11070715), 2020-06-27

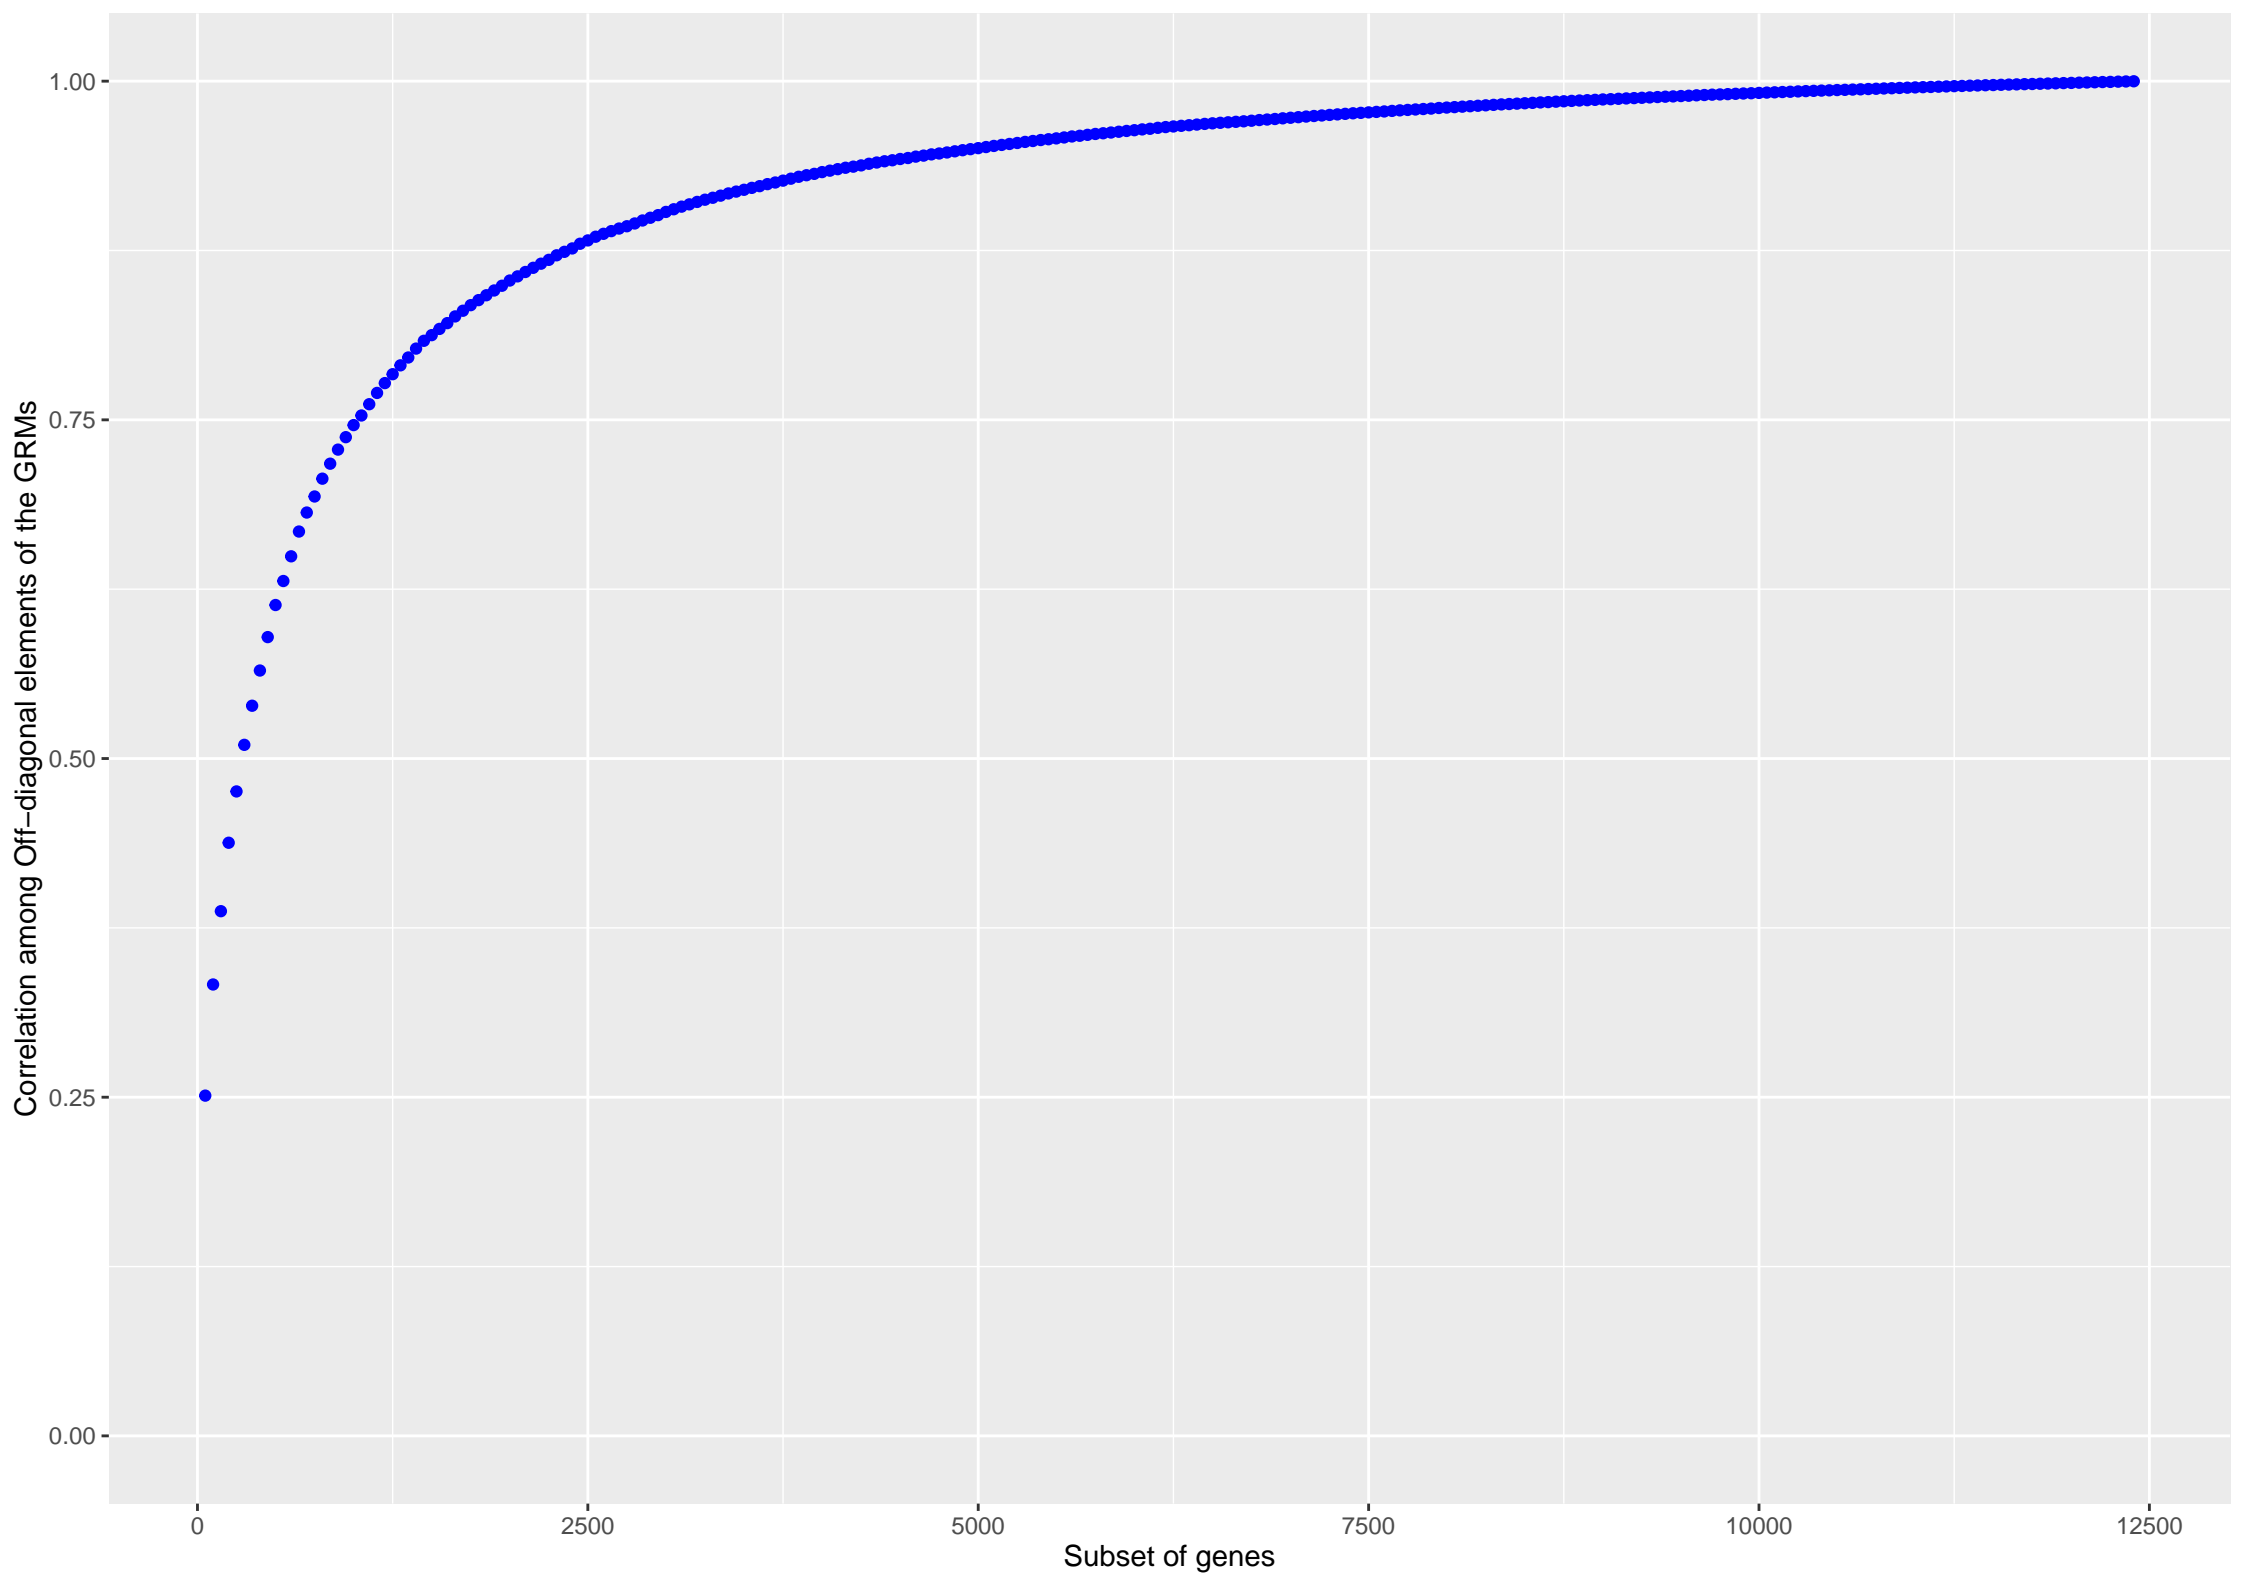

Supplement: s1 [file s1]

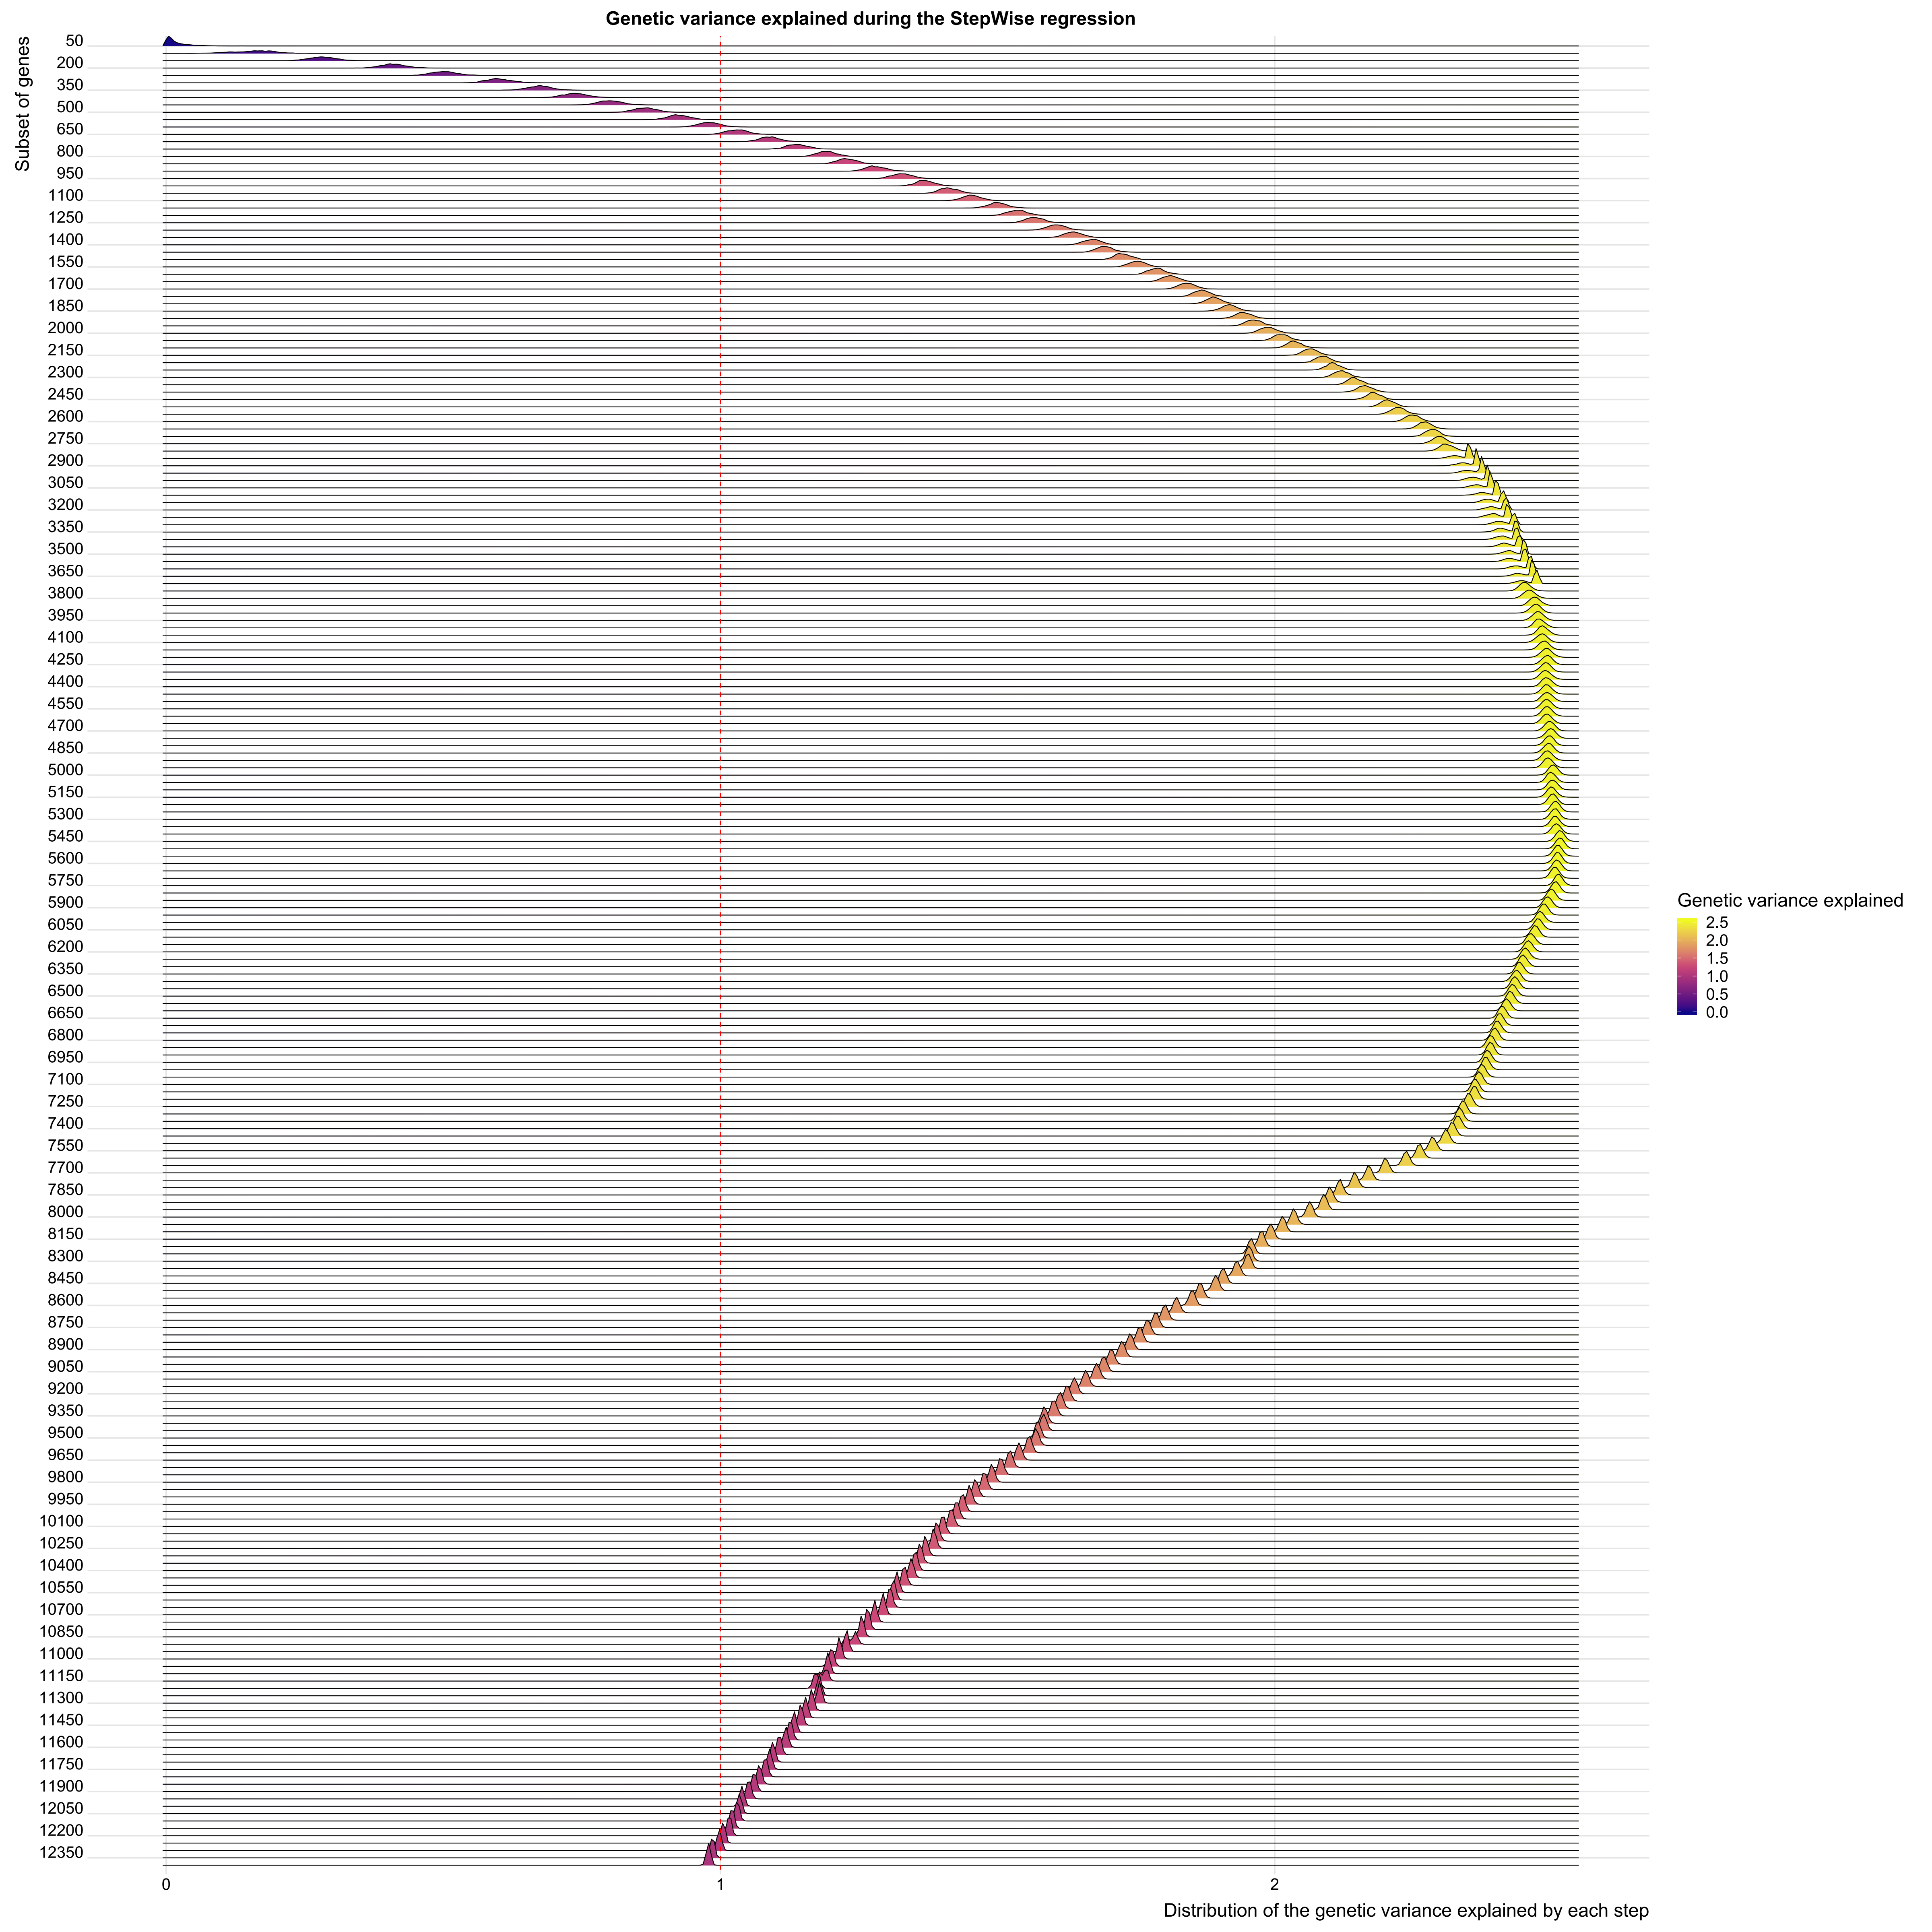

Supplement: s1 [file s1]

Pedigromics: 374 genes.

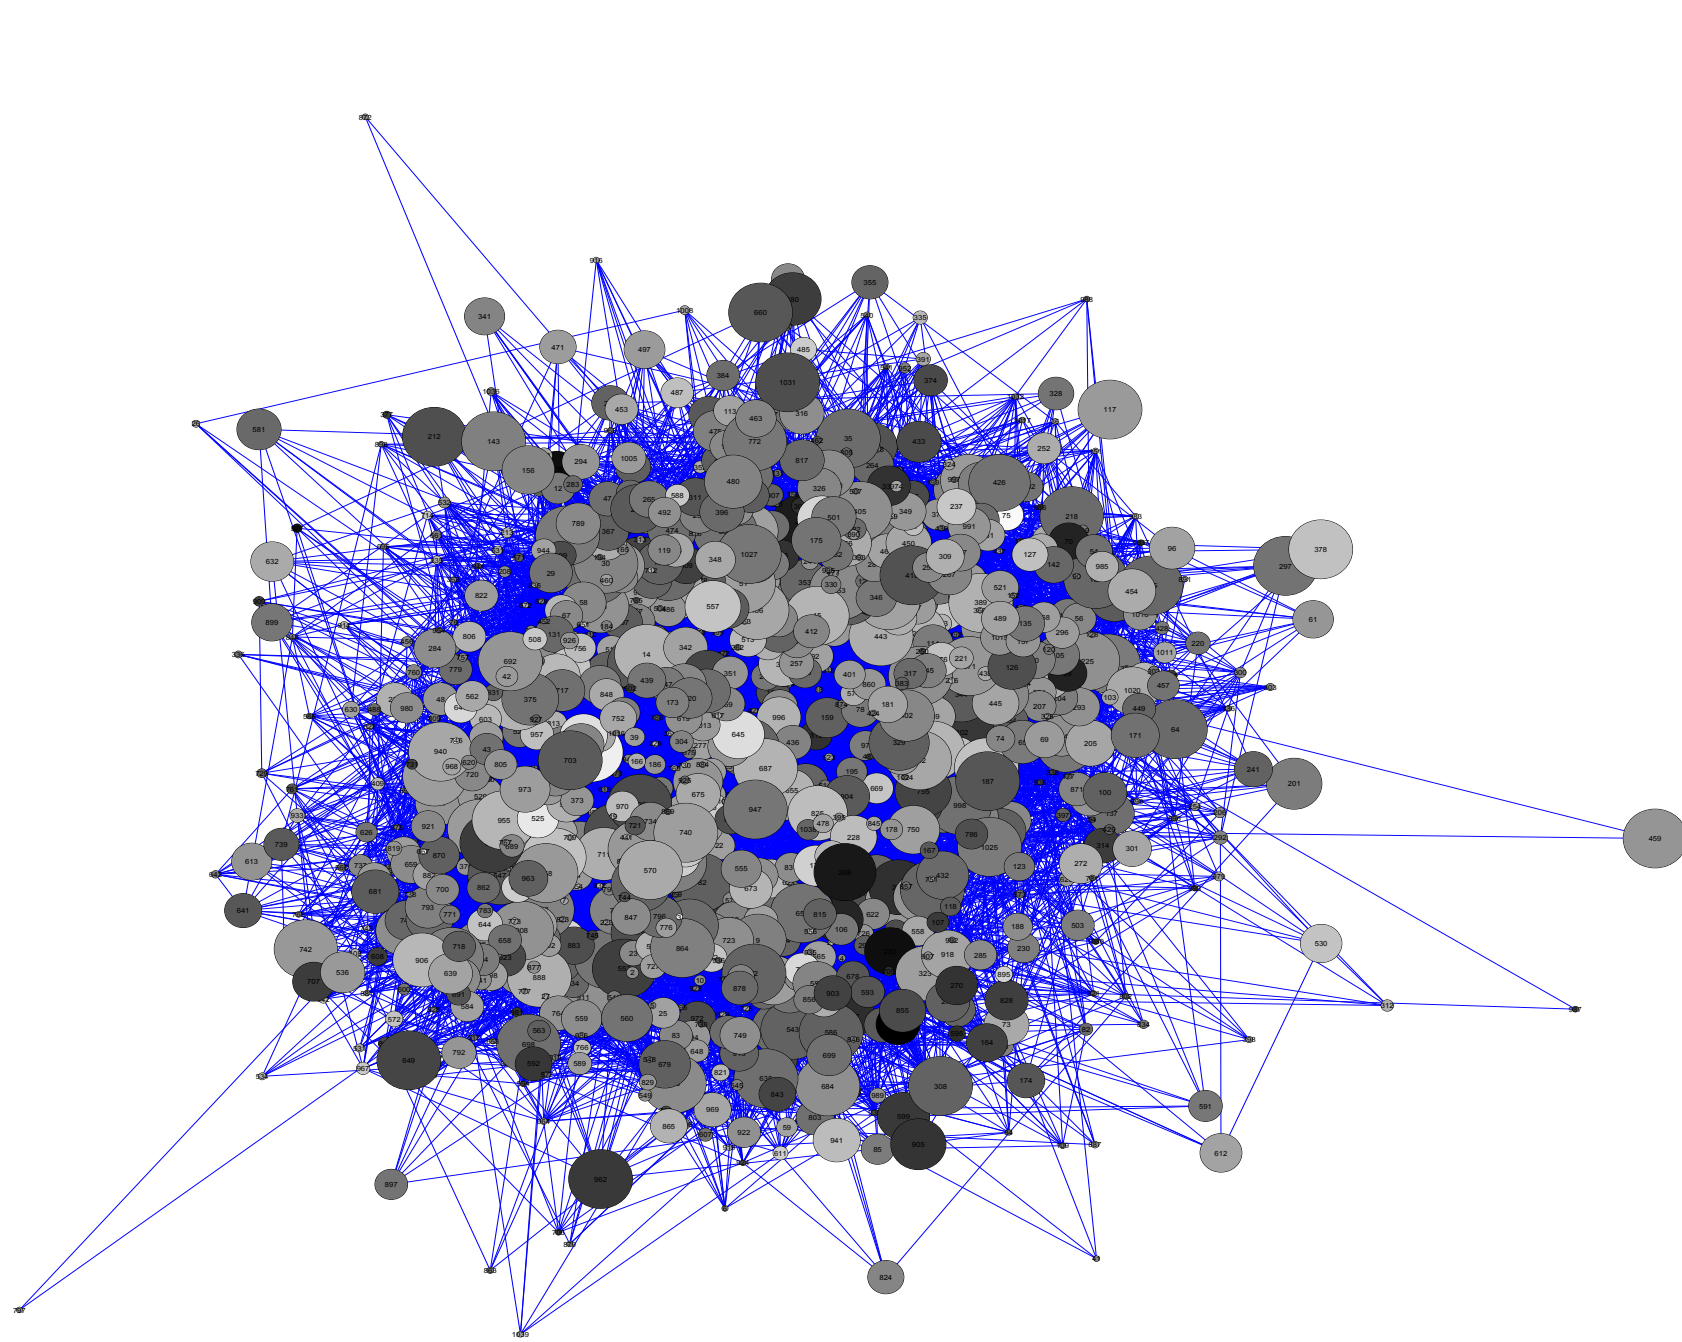

Pedigromics: 4586 genes.

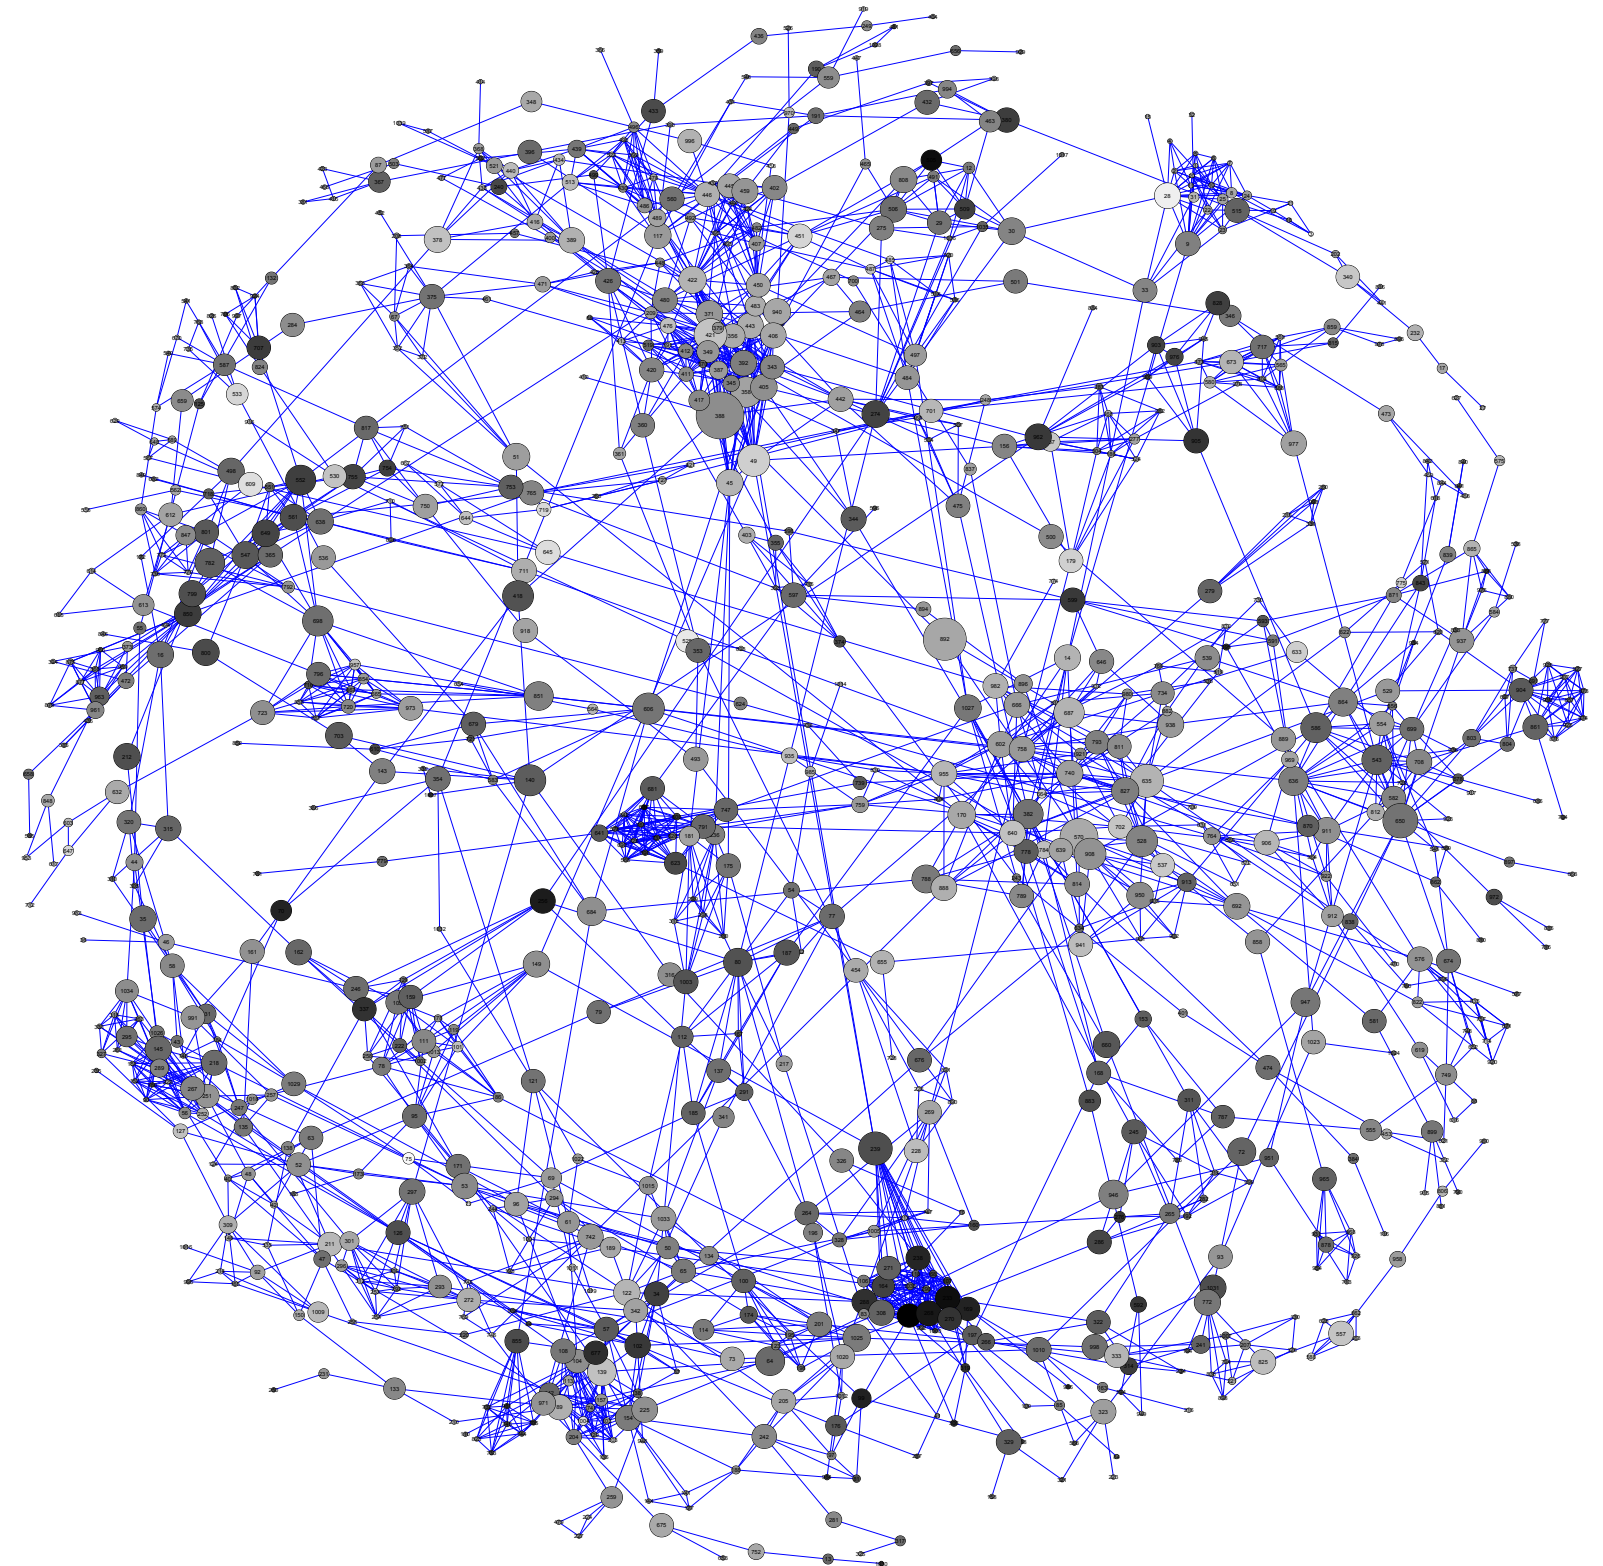

Supplement: s1 [file s1]
